# Supplementary material for: Remodeling of secretory lysosomes during education tunes functional potential in NK cells
Source: PubMed Central journal article supplement (PMC6355880; doi:10.1038/s41467-019-08384-x), 2019-01-31
Supplement: 41467_2019_8384_MOESM1_ESM.pdf [file 41467_2019_8384_MOESM1_ESM.pdf]

## Supplementary Information

### *Remodeling of Secretory Lysosomes During Education Tunes Functional Potential in NK Cells*

Jodie P. Goodridge<sup>1,2</sup>, Benedikt Jacobs<sup>1,2</sup>, Michelle L. Saetersmoen<sup>1,2</sup>, Dennis Clement<sup>1,2</sup>,  
Quirin Hammer<sup>3</sup>, Trevor Clancy<sup>1,2</sup>, Ellen Skarpen<sup>4</sup>, Andreas Brech<sup>4</sup>, Johannes Landskron<sup>1,5</sup>,  
Christian Grimm<sup>6</sup>, Aline Pfefferle<sup>3</sup>, Leonardo Meza-Zepeda<sup>7,8</sup>, Susanne Lorenz<sup>8</sup>, Merete Thune  
Wiiger<sup>1,2</sup>, William E. Louch<sup>9</sup>, Eivind Heggernes Ask<sup>1,2</sup>, Lisa L. Liu<sup>3</sup>, Vincent Yi Sheng Oei<sup>1,2</sup>,  
Una Kjällquist<sup>10</sup>, Sten Linnarsson<sup>10</sup>, Sandip Patel<sup>11</sup>, Kjetil Taskén<sup>1,2,5</sup>, Harald Stenmark<sup>4</sup>, Karl-  
Johan Malmberg<sup>1,2,3</sup>

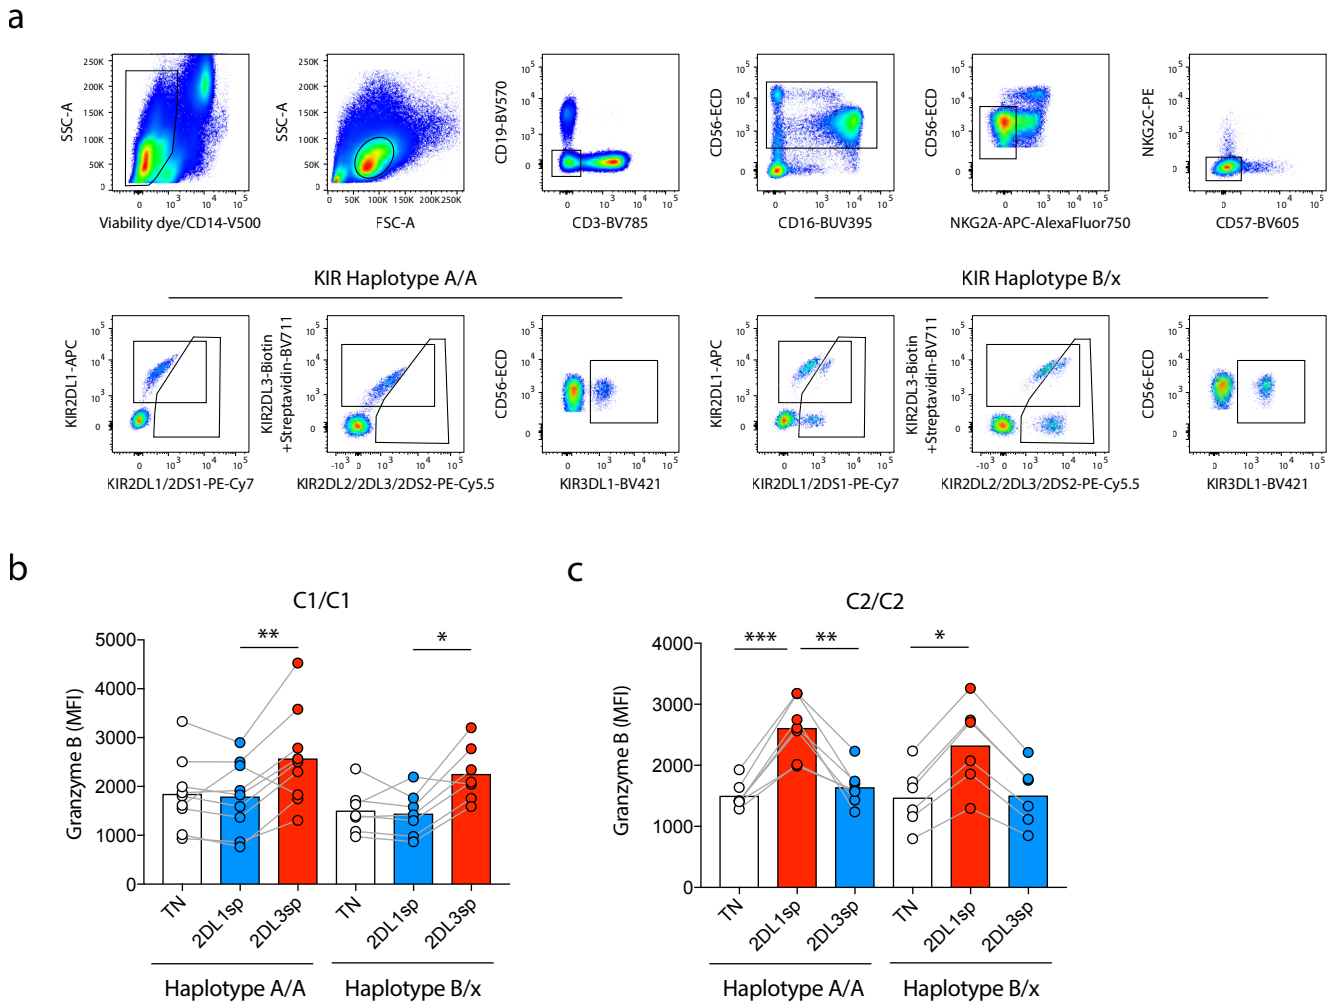

**Supplementary Figure 1. Gating scheme and analysis of granzyme B expression in haplotype A/A and haplo-type B/x donors. (a)** Example of gating scheme for analysis of expression of effector molecules in discrete NKG2A-CD57- NK cell subsets expressing single KIR. (b-c) Expression of granzyme B in NK cells triple negative (TN) for 2DL1, 2DL2/3, 3DL1 or expressing either of these KIR as their only KIR. Stratified analysis of donors with haplotype A/A and B/x in **(b)** HLA-C1/C1 and **(c)** HLA-C2/C2 donors. Red and blue colors indicate expression of self and non-self KIR, respectively. Friedman's test followed by Dunn's multiple comparison test were performed in panels b and c. \*\*:  $p < 0.001$ ; \*\* $p < 0.01$ ; and \* $p < 0.05$ .

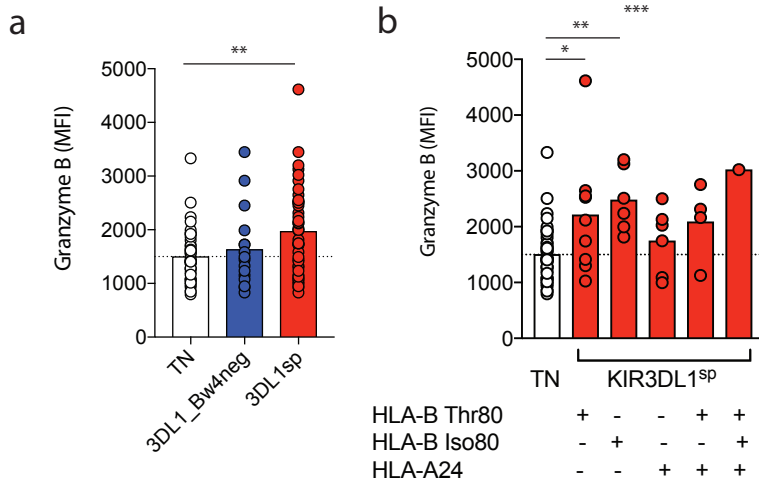

**Supplementary Figure 2. Granzyme B expression stratified based on KIR3DL1 and HLA-Bw4 ligands.**

**(a)** Expression of granzyme B in the indicated NKG2A-CD57- NK cell subset from Bw4+ (n=26) and Bw4- donors (n=16). TN=triple negative for 2DL1, 2DL3 and 3DL1. 3DL1sp=3DL1 single-positive.

**(b)** Substratification showing expression of granzyme B in 3DL1sp NK cells based on the Bw4 ligands Bw4<sup>Thr80</sup> (n=9), Bw4<sup>Iso80</sup> (n=6), Bw4<sup>A24</sup> (n=6), Bw4<sup>Thre80+A24</sup> (n=4) and Bw4<sup>Iso80+A24</sup> (n=1) were too rare to be analysed separately. One-way ANOVAs followed by Tukeys' multiple comparison test were performed in panels a and b. \*\*\*; p < 0.001; \*\*p < 0.01; and \*p < 0.05.

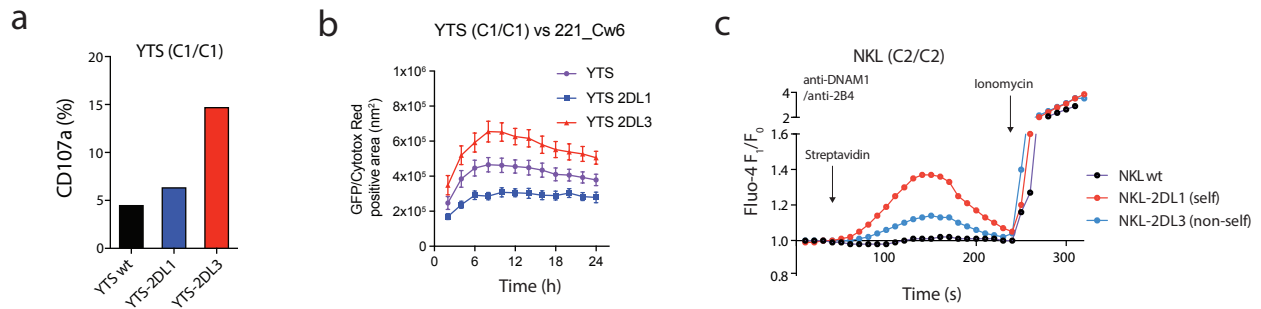

**Supplementary Figure 3. Functional responses in KIR-transduced NK cell lines.** (a) Degranulation in YTS cells transduced to express self (2DL3) and non-self (2DL1) KIR. (b) Long-term cyto-toxicity assay in the Incucyte showing killing (GFP+Cytotox Red+ area) of 221.Cw6.GFP+ cells by the KIR engineered YTS lines E:T ratio 1:1. Bars represent SD of triplicates. (c) Ca<sup>2+</sup>-flux in NKL cells transduced with self (2DL1) and non-self (2DL3) KIR in response to crosslinking of DNAM-1/2B4. Graphs in panels a-c show one representative of two experiments.

a

Before sort

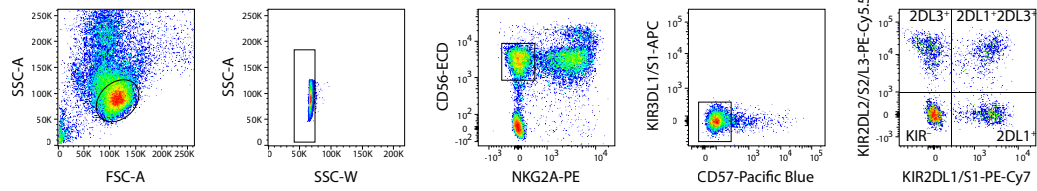

After sort

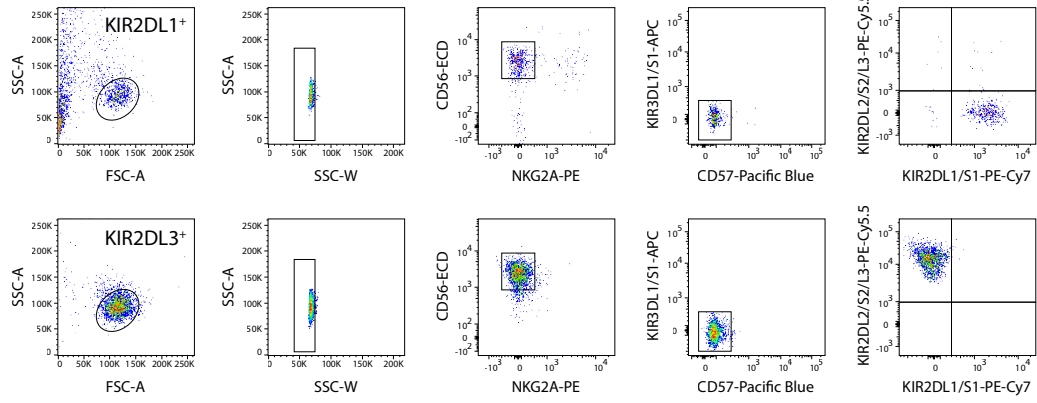

b

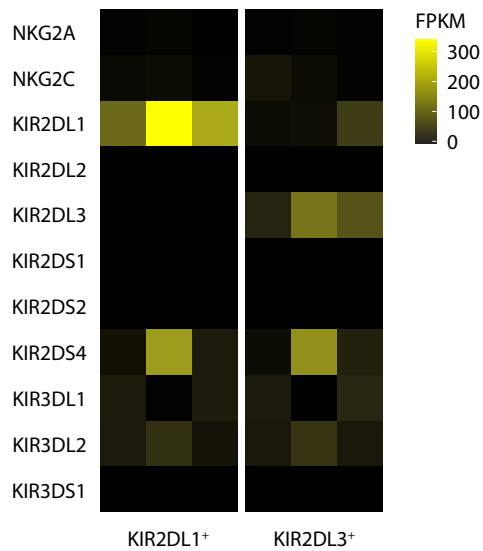

**Supplementary Figure 4 .Purity of sorted subsets. (a)** Representative example of NK cell phenotypes before and after flowcytometry-based sort from an haplotype A C1/C1 donor. **(b)** RNA-Seq of sorted 2DL1<sup>+</sup> (left) or 2DL3<sup>+</sup> (right) NKG2A<sup>-</sup>NKG2C<sup>-</sup>CD57<sup>-</sup>CD56<sup>dim</sup> NK cell subsets. Data are from three representative donors. FPKM; fragments per kilobase of exon per million reads mapped.

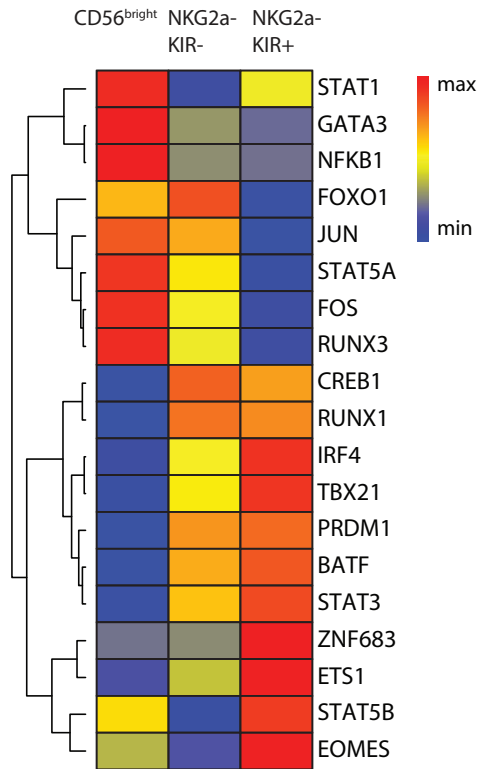

**Supplementary Figure 5. Transcriptional regulation of NK cell differentiation.** Global RNA-Seq of sorted CD56<sup>bright</sup>, NKG2A<sup>-</sup>panKIR<sup>-</sup> and NKG2A<sup>-</sup>panKIR<sup>+</sup> CD56<sup>dim</sup> NK cell subsets. Shown are genes involved in the regulation of cytokine responsiveness and transcription of effector molecules, including gran-zyme B. Data are from one representative donor out of three independent donors.

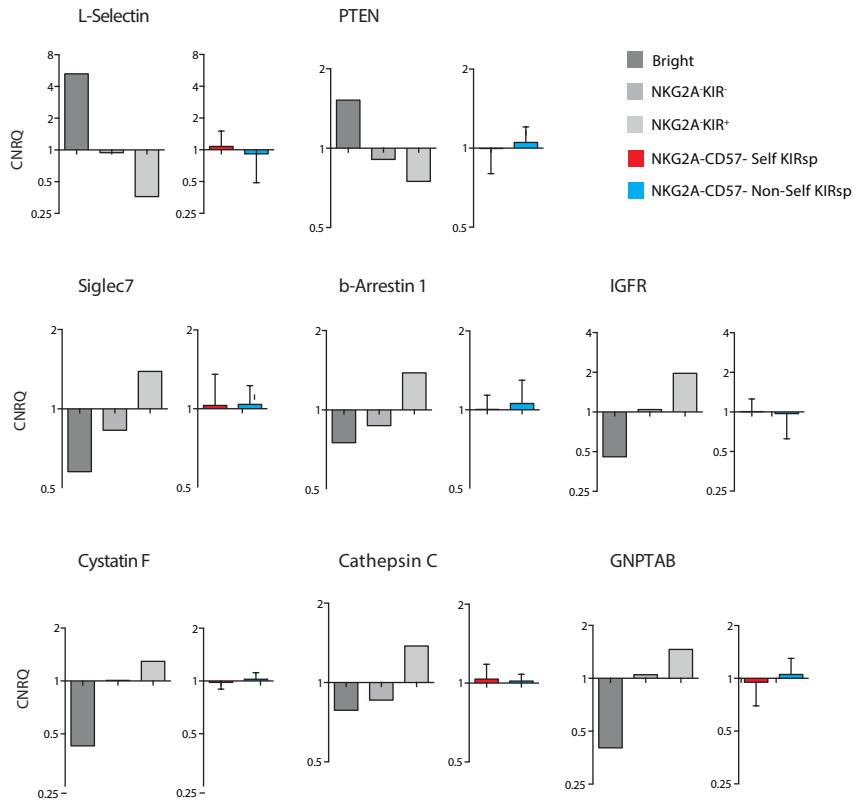

**Supplementary Figure 6. Transcriptional dissociation of differentiation and education.** Quantitative PCR of mRNA of the indicated markers in sorted CD56<sup>bright</sup>, NKG2A<sup>pan</sup>KIR<sup>-</sup> and NKG2A<sup>pan</sup>KIR<sup>+</sup> CD56<sup>dim</sup> NK cell subsets (left, 4 pooled samples) as well as in sorted NKG2A<sup>-</sup>CD57<sup>-</sup> CD56<sup>dim</sup> NK cells expressing self or non-self KIR (right, n=5 paired samples). Markers showing a positive relationship with differentiation were selected for comparison with education subsets. Whiskers show 5th to 95th percentile.

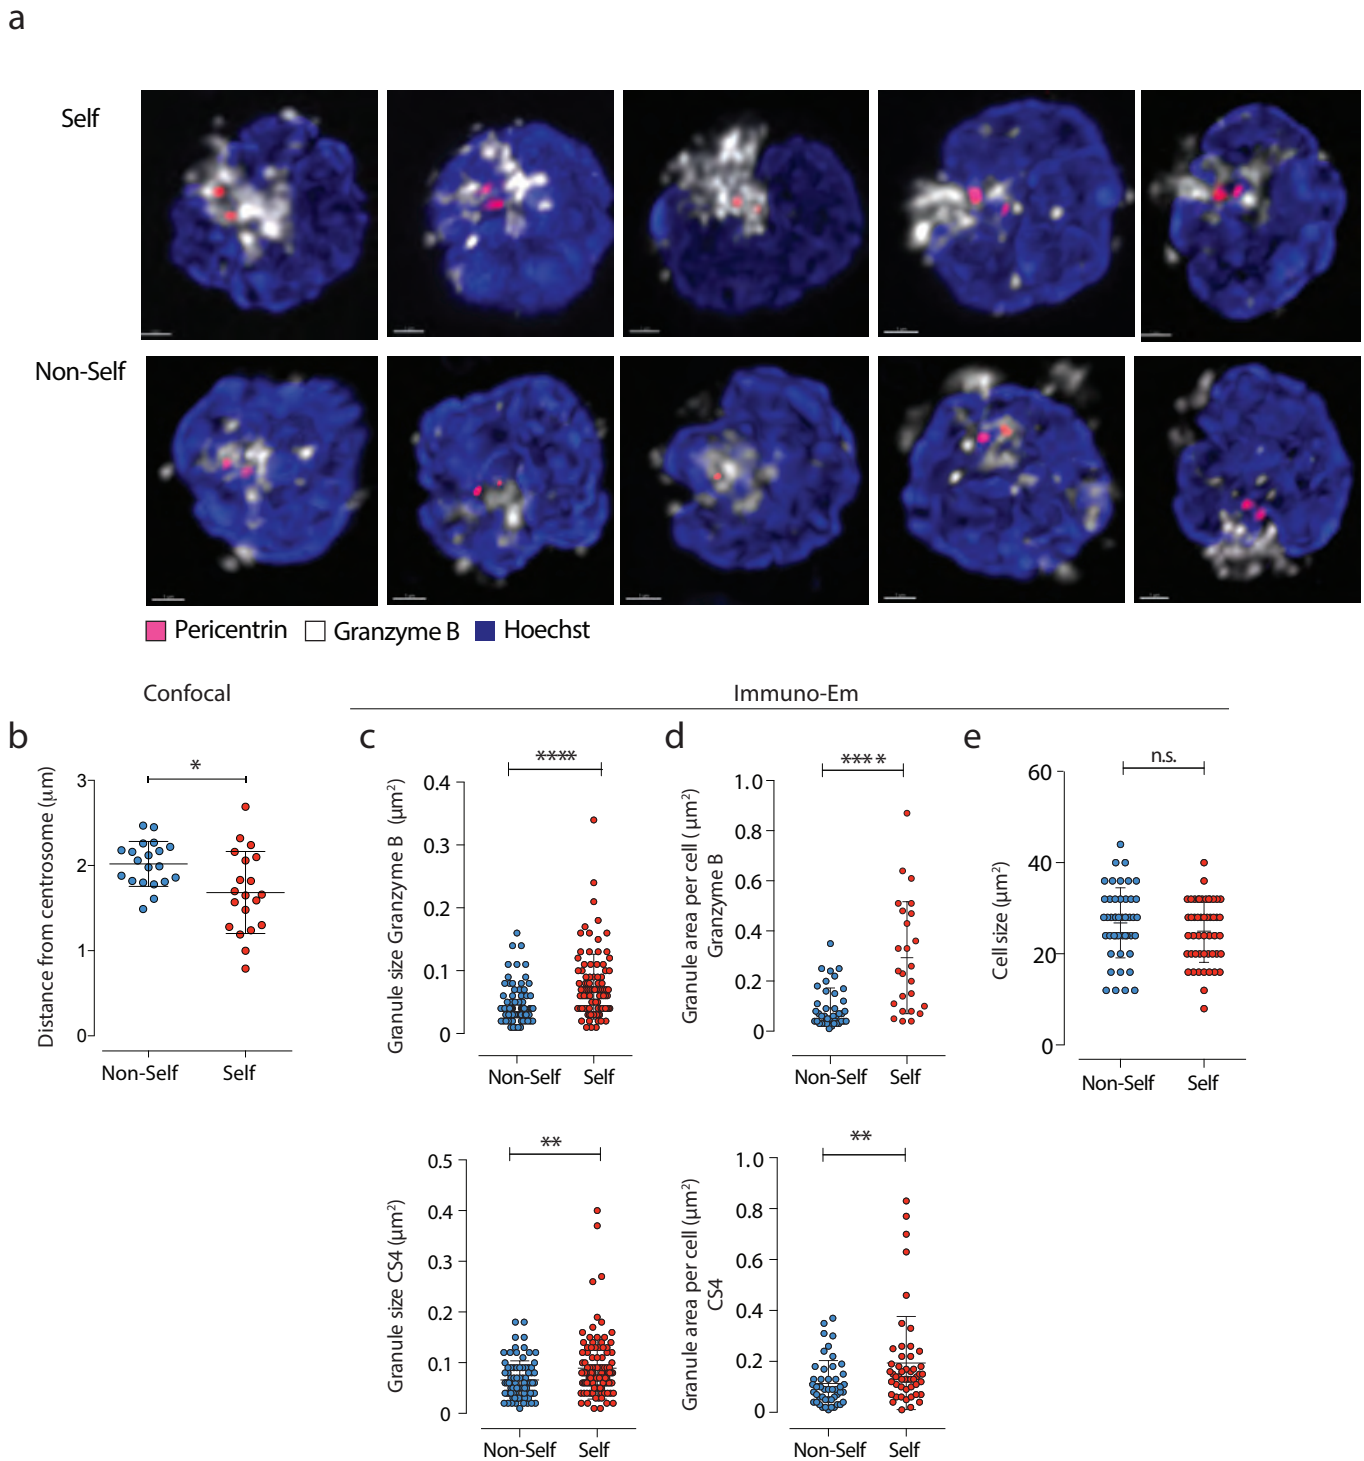

**Supplementary Figure 7. Expression of self-KIR is associated with accumulation of large granzyme B dense secretory lysosomes.** (a) Confocal Z-stacks showing Pericentrin (PCNT) in red and granzyme B staining in white in sorted CD56dim NKG2A-CD57- NK cells expressing Self (top) or Non-Self KIR (bottom). A panel of representative phenotypes acquired from one representative donor out of 5 is shown. (b) Average distance from the centrosome of the brightest lysosomal structures (top 25%) in confocal microscopy, n=20 cells per condition. (c) Granule size as determined by using grid overlay of electron dense structures staining positive for granzyme B (upper panel) and Chondroitin Sulphate-4 (CS4) (lower panel). (d) Granule area per cell as determined by taking total calculated granule area per cell for structures staining positive for granzyme B (upper panel) and CS-4 (lower panel). (e) Comparison of cell size between Self (n=50) and Non-Self (n=49) KIR+ NK cells. Whiskers show 5th to 95th percentile. Bars show the median. Non-parametric Mann-Whitney tests were performed in panels b-e. \*\*\*\*p < 0.0001; \*\*p < 0.01; and \*p < 0.05



a

Granzyme B

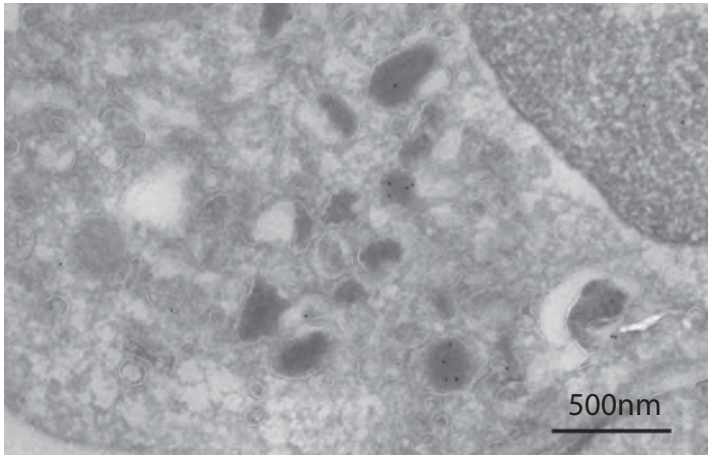

Non-Self

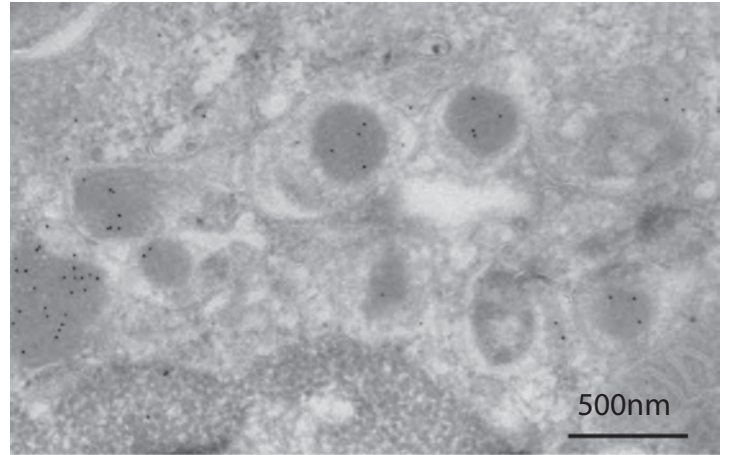

Self

b

Chondroitin Sulphate (CS-4)

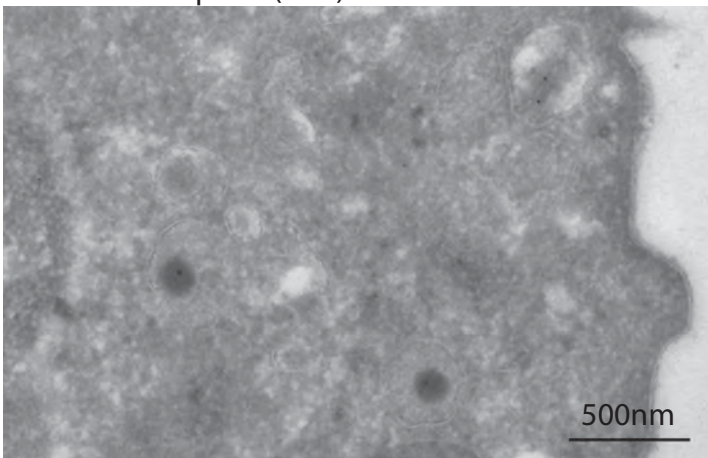

Non-self

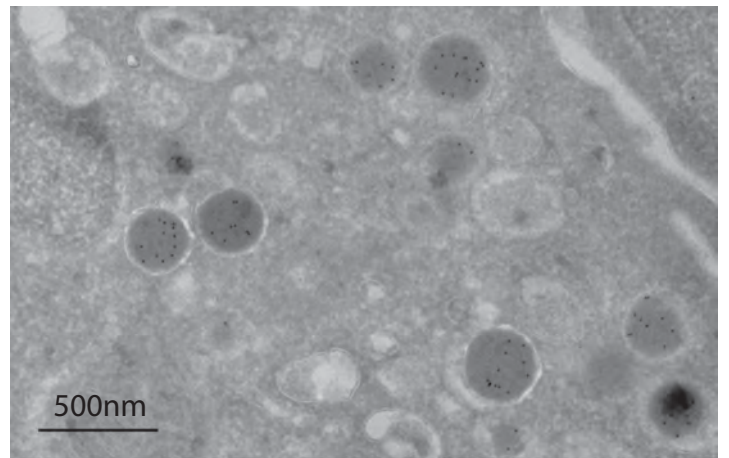

Self

**Supplementary Figure 8. Immuno-EM of sorted self/nonself KIR<sup>+</sup>NKG2A<sup>-</sup>CD57<sup>-</sup> CD56<sup>dim</sup>NK cells.** Representative immuno-EM sections showing staining with gold-particle coated anti-granzyme B (a) and chondroitin Sulphate-4 (CS-4) (b) of sorted CD56<sup>dim</sup> NKG2A<sup>-</sup>CD57<sup>-</sup> NK cells expressing non-self (left) or self KIR (right). Immuno-EM images are from sections of representative cells from n=5 donors and n=5 experiments.

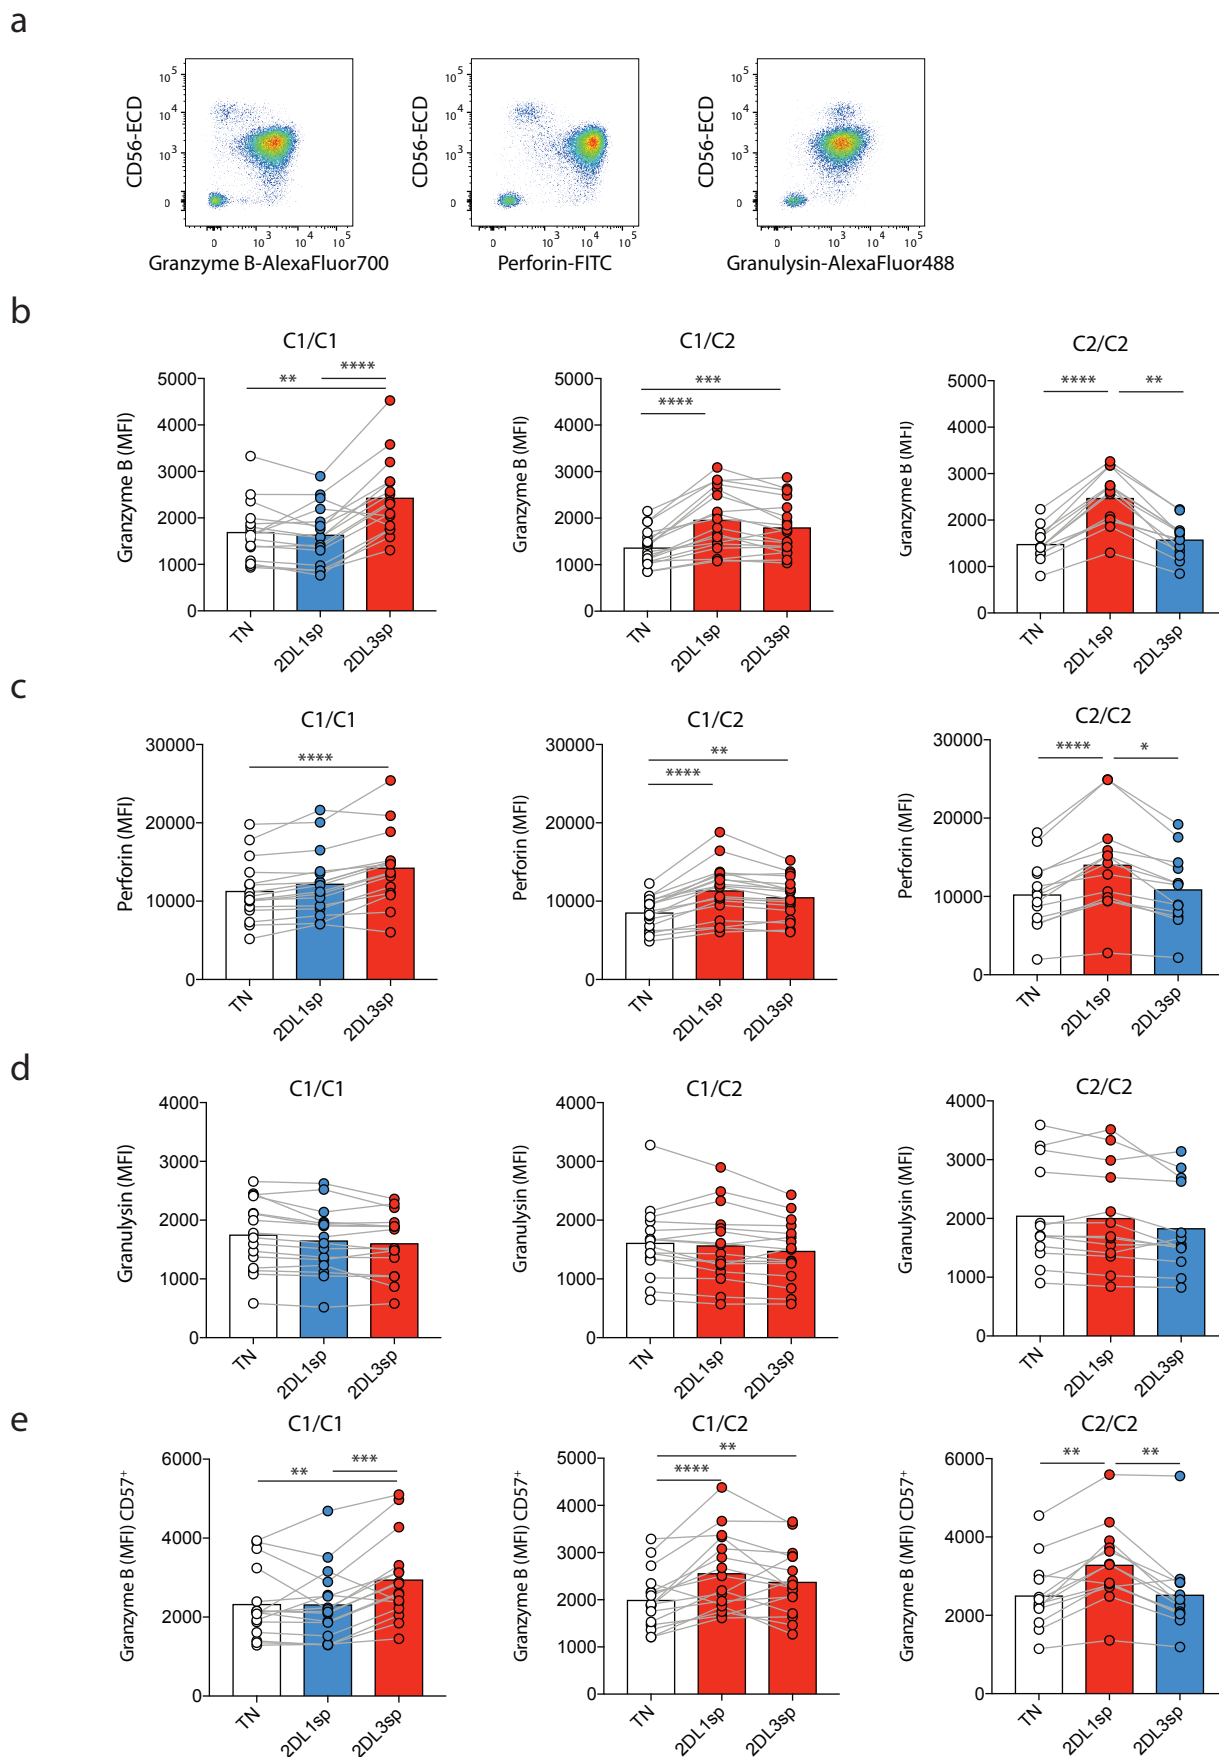

**Supplementary Figure 9. NK cell education through self-KIR is associated with accumulation of granzyme B and perforin but not granulysin.** (a) Representative examples showing expression of granzyme B, perforin and granulysin in CD56<sup>bright</sup> and CD56<sup>dim</sup> NK cells. Expression of (b) granzyme B (c) perforin and (d) granulysin in NKG2A<sup>-</sup>CD57<sup>-</sup> NK cells expressing the indicated KIR in C1/C1 (n=16), C1/C2 (n=18) and C2/C2 (n=13) donors. KIR2DL1 single-positive (2DL1sp). (e) Expression of granzyme B in NKG2A<sup>-</sup>CD57<sup>+</sup> NK cells expressing the indicated KIR in C1/C1 (n=16), C1/C2 (n=18) and C2/C2 (n=13) donors. Friedman's test followed by Dunn's multiple comparison test were performed in panels b-e. In panel d, there was no statistical accumulation of granulysin in any of the KIR<sup>+</sup> subsets. \*\*\*\*p < 0.0001\*\*\*; p < 0.001; \*\*; p < 0.01 and \*p < 0.05.

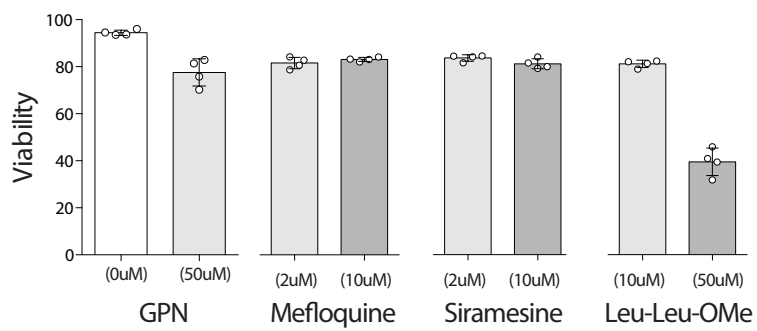

**Supplementary Figure 10. Viability of NK cells exposed to lysosomotropic compounds.** Viability was determined by titration of each of the indicated compounds during 4 hours by monitoring incorporation of a live/dead marker for cell viability using flow cytometry. Shown are the mean of 4 replicates. Whiskers show standard deviation.

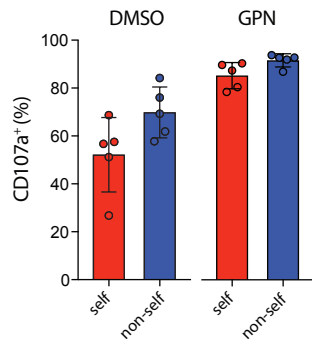

**Supplementary Figure 11 Compromising lysosomal activity increases the functional response PMA/Ionomycin stimulation.** Resting NK cells were treated with PMA (1ng/mL) and Iono-mycin (0.5  $\mu$ M) for 4 hours in the presence of DMSO (control) or GPN at 50 $\mu$ M (n=5). Whiskers show standard deviation.

**Supplementary Table 1**

---

| Effector Transcription | mTOR Signaling  |                 |                 |                      |
|------------------------|-----------------|-----------------|-----------------|----------------------|
| <i>NFATC1</i>          | <i>AKT3</i>     | <i>ATP6V1H</i>  | <i>SKP2</i>     | <i>STRADA</i>        |
| <i>RUNX1</i>           | <i>RRAGB</i>    | <i>PDPK1</i>    | <i>SLC3A2</i>   | <i>ATP6V1F</i>       |
| <i>IKAROS</i>          | <i>LAMTOR5</i>  | <i>CAB39</i>    | <i>SOS1</i>     | <i>EIF4E2</i>        |
| <i>JUN</i>             | <i>NPRL2</i>    | <i>ATP6V1A</i>  | <i>SOS2</i>     | <i>ATP6V1G1</i>      |
| <i>FOS</i>             | <i>RRAGA</i>    | <i>ATP6V1B1</i> | <i>BRAF</i>     | <i>FNIP1</i>         |
| <i>NFKB1</i>           | <i>FZD10</i>    | <i>ATP6V1B2</i> | <i>STK11</i>    | <i>TTI1</i>          |
| <i>MITF</i>            | <i>CHUK</i>     | <i>ATP6V1C1</i> | <i>TNF</i>      | <i>DEPDC5</i>        |
| <i>IRF4</i>            | <i>ATP6V1G3</i> | <i>ATP6V1E1</i> | <i>TNFRSF1A</i> | <i>ULK2</i>          |
| <i>BATF</i>            | <i>SLC38A9</i>  | <i>PIK3CA</i>   | <i>TSC1</i>     | <i>TELO2</i>         |
| <i>EOMES</i>           | <i>DVL1</i>     | <i>PIK3CB</i>   | <i>TSC2</i>     | <i>TBC1D7</i>        |
| <i>TBX21</i>           | <i>DVL2</i>     | <i>PIK3CD</i>   | <i>WNT1</i>     | <i>-LOC100130357</i> |
| <i>PRDM1</i>           | <i>DVL3</i>     | <i>PIK3CG</i>   | <i>WNT2</i>     |                      |
| <i>STAT1</i>           | <i>EIF4B</i>    | <i>PIK3R1</i>   | <i>WNT3</i>     |                      |
| <i>STAT3</i>           | <i>EIF4E</i>    | <i>PIK3R2</i>   | <i>WNT5A</i>    |                      |
| <i>STAT5A</i>          | <i>EIF4EBP1</i> | <i>ATP6V1G2</i> | <i>WNT6</i>     |                      |
| <i>STAT5B</i>          | <i>FLCN</i>     | <i>WNT4</i>     | <i>WNT7A</i>    |                      |
| <i>ETS1</i>            | <i>AKT1</i>     | <i>MIOS</i>     | <i>WNT7B</i>    |                      |
| <i>RUNX3</i>           | <i>AKT2</i>     | <i>DDIT4</i>    | <i>WNT8A</i>    |                      |
| <i>CREB1</i>           | <i>RNF152</i>   | <i>LAMTOR1</i>  | <i>WNT8B</i>    |                      |
| <i>GATA3</i>           | <i>LPIN1</i>    | <i>STRADB</i>   | <i>WNT10B</i>   |                      |
| <i>FOXO1</i>           | <i>PIK3R5</i>   | <i>PRR5</i>     | <i>WNT11</i>    |                      |
|                        | <i>ATP6V1C2</i> | <i>PRKAA1</i>   | <i>WNT2B</i>    |                      |
|                        | <i>MTOR</i>     | <i>PRKAA2</i>   | <i>WNT9A</i>    |                      |
|                        | <i>RICTOR</i>   | <i>PRKCA</i>    | <i>WNT9B</i>    |                      |
|                        | <i>EIF4E1B</i>  | <i>PRKCB</i>    | <i>FZD5</i>     |                      |
|                        | <i>FZD2</i>     | <i>PRKCG</i>    | <i>MAPKAP1</i>  |                      |
|                        | <i>ULK3</i>     | <i>MAPK1</i>    | <i>WDR59</i>    |                      |
|                        | <i>RPS6KA6</i>  | <i>MAPK3</i>    | <i>FZD3</i>     |                      |
|                        | <i>GRB2</i>     | <i>MAP2K1</i>   | <i>WNT10A</i>   |                      |
|                        | <i>GRB10</i>    | <i>MAP2K2</i>   | <i>WNT5B</i>    |                      |
|                        | <i>LAMTOR2</i>  | <i>PTEN</i>     | <i>NPRL3</i>    |                      |
|                        | <i>GSK3B</i>    | <i>RPTOR</i>    | <i>SLC7A5</i>   |                      |
|                        | <i>HRAS</i>     | <i>FNIP2</i>    | <i>CAB39L</i>   |                      |
|                        | <i>IGF1</i>     | <i>RRAGD</i>    | <i>SEH1L</i>    |                      |
|                        | <i>IGF1R</i>    | <i>RAF1</i>     | <i>FZD1</i>     |                      |
|                        | <i>IKBKB</i>    | <i>RHEB</i>     | <i>FZD4</i>     |                      |
|                        | <i>INS</i>      | <i>RPS6</i>     | <i>FZD6</i>     |                      |
|                        | <i>INSR</i>     | <i>RPS6KA1</i>  | <i>FZD7</i>     |                      |
|                        | <i>IRS1</i>     | <i>RPS6KA2</i>  | <i>FZD8</i>     |                      |
|                        | <i>KRAS</i>     | <i>RPS6KA3</i>  | <i>FZD9</i>     |                      |
|                        | <i>RHOA</i>     | <i>RPS6KB1</i>  | <i>SESN2</i>    |                      |
|                        | <i>LAMTOR4</i>  | <i>RPS6KB2</i>  | <i>ULK1</i>     |                      |
|                        | <i>LRP6</i>     | <i>CLIP1</i>    | <i>WDR24</i>    |                      |
|                        | <i>LRP5</i>     | <i>SEC13</i>    | <i>AKT1S1</i>   |                      |
|                        | <i>NRAS</i>     | <i>RRAGC</i>    | <i>PIK3R3</i>   |                      |
|                        | <i>TBC1D7</i>   | <i>MLST8</i>    | <i>LAMTOR3</i>  |                      |
|                        | <i>ATP6V1D</i>  | <i>SGK1</i>     | <i>WNT3A</i>    |                      |
|                        | <i>WNT16</i>    | <i>DEPTOR</i>   | <i>ATP6V1E2</i> |                      |

---

---

## Lysosomal Biogenesis

---

|                |                 |                 |               |
|----------------|-----------------|-----------------|---------------|
| <i>A2M</i>     | <i>F2R</i>      | <i>RAB26</i>    | <i>TMED10</i> |
| <i>ABCA1</i>   | <i>F2RL3</i>    | <i>RAB27A</i>   | <i>TMED2</i>  |
| <i>ABCA12</i>  | <i>F5</i>       | <i>RAB4A</i>    | <i>TOR1A</i>  |
| <i>ABCC4</i>   | <i>F8</i>       | <i>RAB4B</i>    | <i>VAMP1</i>  |
| <i>ACTB</i>    | <i>FGA</i>      | <i>REST</i>     | <i>VAMP2</i>  |
| <i>ACTN1</i>   | <i>FGB</i>      | <i>SELP</i>     | <i>VAMP7</i>  |
| <i>ACTN2</i>   | <i>FGG</i>      | <i>SERPINA1</i> | <i>VAMP8</i>  |
| <i>ACTN4</i>   | <i>FN1</i>      | <i>SERPINA5</i> | <i>VEGFA</i>  |
| <i>ADAM8</i>   | <i>GAL</i>      | <i>SERPINE1</i> | <i>VPS33B</i> |
| <i>ALDOA</i>   | <i>GAS6</i>     | <i>SERPINF2</i> | <i>VWF</i>    |
| <i>AP1G1</i>   | <i>GHRL</i>     | <i>SFTPD</i>    | <i>ZP3</i>    |
| <i>APOA1</i>   | <i>HGF</i>      | <i>SLC11A1</i>  |               |
| <i>APP</i>     | <i>HPS4</i>     | <i>SLC2A4</i>   |               |
| <i>AZU1</i>    | <i>HRG</i>      | <i>SNAP23</i>   |               |
| <i>BLOC1S1</i> | <i>HSPD1</i>    | <i>SNAPIN</i>   |               |
| <i>BLOC1S2</i> | <i>IGF1</i>     | <i>SNCA</i>     |               |
| <i>BLOC1S3</i> | <i>IGF2</i>     | <i>SNX19</i>    |               |
| <i>BRCA2</i>   | <i>INS</i>      | <i>SNX19</i>    |               |
| <i>CAPZB</i>   | <i>ITGA2B</i>   | <i>SPACA1</i>   |               |
| <i>CASC5</i>   | <i>ITGB3</i>    | <i>SPACA3</i>   |               |
| <i>CCDC64</i>  | <i>KIT</i>      | <i>SPARC</i>    |               |
| <i>CD36</i>    | <i>KLK7</i>     | <i>SPESP1</i>   |               |
| <i>CD63</i>    | <i>LRGUK</i>    | <i>SPINK5</i>   |               |
| <i>CD9</i>     | <i>LYST</i>     | <i>SRGN</i>     |               |
| <i>CHGA</i>    | <i>MPO</i>      | <i>SRI</i>      |               |
| <i>CLCN3</i>   | <i>MYO5A</i>    | <i>STX3</i>     |               |
| <i>CLU</i>     | <i>OLFM4</i>    | <i>STX4</i>     |               |
| <i>CPE</i>     | <i>PAFAH1B1</i> | <i>STX7</i>     |               |
| <i>CTSG</i>    | <i>PDGFA</i>    | <i>STXBP1</i>   |               |
| <i>CTSH</i>    | <i>PDGFB</i>    | <i>STXBP3</i>   |               |
| <i>CXADR</i>   | <i>PECAM1</i>   | <i>TEKT3</i>    |               |
| <i>CYBA</i>    | <i>PLG</i>      | <i>TF</i>       |               |
| <i>DENND4C</i> | <i>PRKCA</i>    | <i>TGFB1</i>    |               |
| <i>DTNBP1</i>  | <i>PTPRN</i>    | <i>TGFB2</i>    |               |
| <i>EGF</i>     | <i>RAB10</i>    | <i>TGFB3</i>    |               |
| <i>ELANE</i>   | <i>RAB11B</i>   | <i>THBS1</i>    |               |
| <i>EXOC3</i>   | <i>RAB13</i>    | <i>TIMP1</i>    |               |

---

Genes involved in effector transcription, mTOR signaling and lysosomal biogenesis.

## Supplementary Table 2

| Gene Symbol | Alias                                                                      | Refseq #  | Official Full Name                                                           | RT2 Catalog Number |
|-------------|----------------------------------------------------------------------------|-----------|------------------------------------------------------------------------------|--------------------|
| PPC         | PPC                                                                        | SA_00103  | Positive PCR Control                                                         | PPX63339           |
| HGDC        | HIGX1A                                                                     | SA_00105  | Human Genomic DNA Contamination                                              | PPH65835           |
| RTC         | RTC                                                                        | SA_00104  | Reverse Transcription Control                                                | PPX63340           |
| 18S rRNA    |                                                                            | X03205    | Human 18S ribosomal RNA                                                      | PPH05666           |
| B2M         | -                                                                          | NM_004048 | Beta-2-microglobulin                                                         | PPH01094           |
| ARRB1       | ARB1/ARR1                                                                  | NM_004041 | Arrestin, beta 1                                                             | PPH02341           |
| GZMB        | CCPI/CGL-1/CGL1/CSP-B/CSPB/CTLA1/CTSGL1/HLP/SECT                           | NM_004131 | Granzyme B (granzyme 2, cytotoxic T-lymphocyte-associated serine esterase 1) | PPH02594           |
| CST7        | CMAF                                                                       | NM_003650 | Cystatin F (leukocystatin)                                                   | PPH05560           |
| SELL        | CD62L/LAM1/LECAM1/LEU8/LNHR/LSEL/LYAM1/PLNHR/TQ1                           | NM_000655 | Selectin L                                                                   | PPH00677           |
| CTSC        | CPP1/DPP-I/DPP1/DPPI/HMS/JP/JPD/PALS/PDON1/PLS                             | NM_001814 | Cathepsin C                                                                  | PPH06129           |
| GNPTAB      | GNPTA/ICD                                                                  | NM_024312 | N-acetylglucosamine-1-phosphate transferase, alpha and beta subunits         | PPH19573           |
| IGF2R       | CD222/CIMPR/M6P-R/MPRI/MPRI                                                | NM_000876 | Insulin-like growth factor 2 receptor                                        | PPH00351           |
| PTEN        | 10q23del/BZS/CWS1/DEC/GLM2/MHAM/MMAC1/PTEN1/TEP1                           | NM_000314 | Phosphatase and tensin homolog                                               | PPH00327           |
| TBX21       | T-PET/T-bet/TBET/TBLYM                                                     | NM_013351 | T-box 21                                                                     | PPH00396           |
| SIGLEC7     | AIRM1/CD328/CDw328/D-siglec/QA79/SIGLEC-7/SIGLEC19P/SIGLECP2/p75/p75/AIRM1 | NM_014385 | Sialic acid binding Ig-like lectin 7                                         | PPH15594           |
| MCOLN1      | TRP-ML1                                                                    | NM_020533 | Mucolipin 1                                                                  | PPH19799A          |
